# Supplementary material for: Substitution of tyrosine with electron-deficient aromatic amino acids improves Ac-PHF6 self-assembly and hydrogelation
Source: Royal Society of Chemistry journal article supplement (doi:10.1039/d5ra03251b), 2025-01-01
Supplement: d5ra03251b1.pdf [file d5ra03251b1.pdf]

## SUPPLEMENTARY INFORMATION

### Substitution of tyrosine with electron-deficient aromatic amino acids improves Ac-PHF6 self-assembly and hydrogelation

Shubhangini Singh Verma and Nitin Chaudhary\*

Department of Biosciences and Bioengineering, Indian Institute of Technology Guwahati, Guwahati – 781 039, India

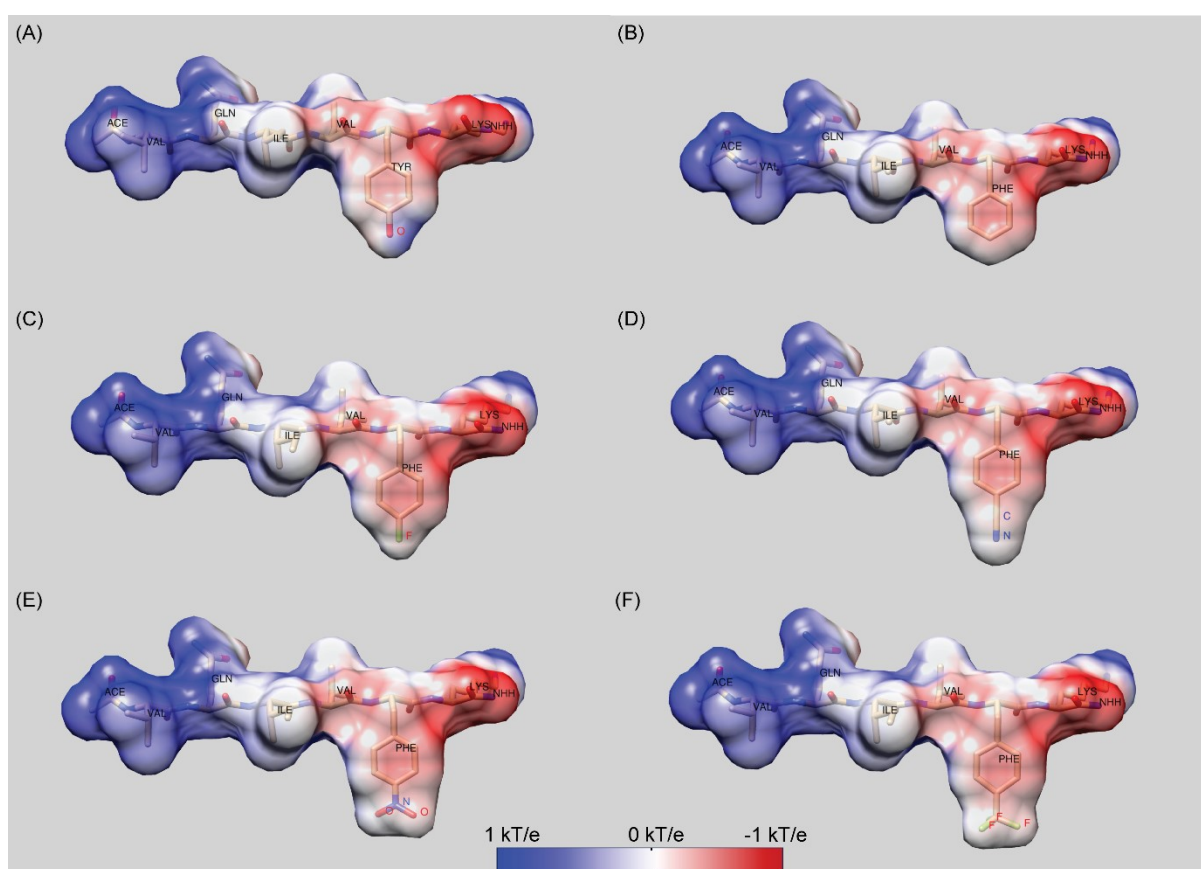

**Fig. S1.** Electrostatic surface charge density maps of (A) Ac-PHF6, (B) Ac-VQIVFK-am, (C) Ac-VQIVF(fl)K-am, (D) Ac-VQIVF(CN)K-am, (E) Ac-VQIVF(NO<sub>2</sub>)K-am, and (F) Ac-VQIVF(CF<sub>3</sub>)K-am.

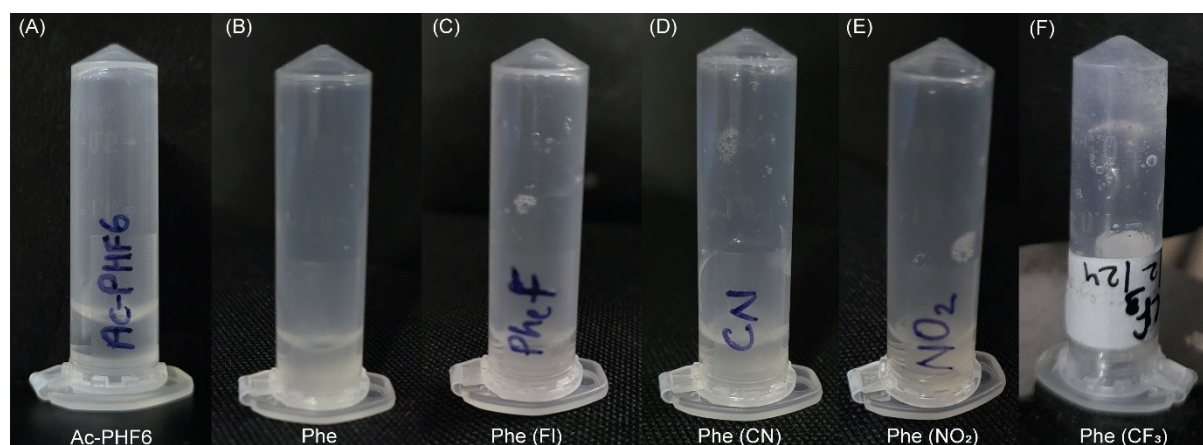

**Fig. S2.** Inverted vials containing >20 mM stock solutions of Ac-PHF6 and its analogs in deionized water. (A) Ac-PHF6, (B) Ac-VQIVFK-am, (C) Ac-VQIVF(fl)K-am, (D) Ac-VQIVF(CN)K-am, (E) Ac-VQIVF(NO<sub>2</sub>)K-am, and (F) Ac-VQIVF(CF<sub>3</sub>)K-am.
